# Supplementary material for: Seed- and solvent-free synthesis of ZSM-5 with tuneable Si/Al ratios for biomass hydrogenation
Source: Royal Society of Chemistry journal article supplement (doi:10.1039/c9gc03622a), 2020-01-01
Supplement: c9gc03622a1.pdf [file c9gc03622a1.pdf]

## Supporting Information

### Seed- and Solvent-Free Synthesis of ZSM-5 with Tuneable Si/Al Ratios for Biomass Hydrogenation

Bin Zhang<sup>†,‡,§</sup>, Mark Douthwaite<sup>§</sup>, Qiang Liu<sup>†</sup>, Chao Zhang<sup>†,\*</sup>, Qifan Wu<sup>†</sup>, Ruhui Shi<sup>†</sup>, Peixuan Wu<sup>†</sup>, Ke Liu<sup>†</sup>, Zhuangqing Wang<sup>†</sup>, Weiwei Lin<sup>†</sup>, Haiyang Cheng<sup>†</sup>, Ding Ma<sup>‡</sup>, Fengyu Zhao<sup>†</sup>, Graham J. Hutchings<sup>§,\*</sup>

<sup>†</sup> State Key Laboratory of Electroanalytical Chemistry and Laboratory of Green Chemistry and Process, Changchun Institute of Applied Chemistry, Chinese Academy of Sciences, Changchun 130022, China

<sup>‡</sup> Beijing National Laboratory for Molecular Sciences, College of Chemistry and Molecular Engineering and College of Engineering, and BIC-ESAT, Peking University, Beijing 100871, China.

<sup>§</sup> Cardiff Catalysis Institute, School of Chemistry, Cardiff University, Cardiff, CF10 3AT, UK

#### Corresponding Author

E-mail: [czhang@ciac.ac.cn](mailto:czhang@ciac.ac.cn); [hutch@cardiff.ac.uk](mailto:hutch@cardiff.ac.uk)

#### Content

**Figure S1-Figure S16**

**Table S1 and Table S2**

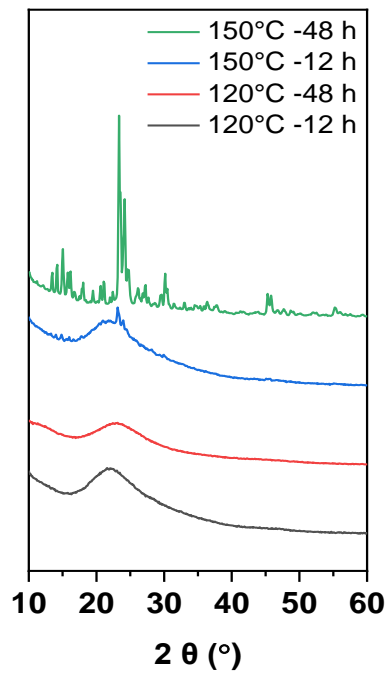

**Figure S1.** XRD patterns of MFI zeolites from  $\text{SiO}_2$  and  $\text{C}_{12}\text{H}_{28}\text{NF}$  at 120 °C (or 150 °C) for 12 h and 48 h of crystallization, respectively.

| Sample           | BET surface area (m <sup>2</sup> g <sup>-1</sup> ) | Pore volume (cm <sup>3</sup> g <sup>-1</sup> ) <sup>a</sup> | Average pore diameter (nm) |
|------------------|----------------------------------------------------|-------------------------------------------------------------|----------------------------|
| silicalite-1     | 212                                                | 0.31                                                        | 4.4                        |
| commercial ZSM-5 | 256                                                | 0.12                                                        | 3.7                        |

<sup>a</sup> BJH mesopore volumes from the desorption isotherm.

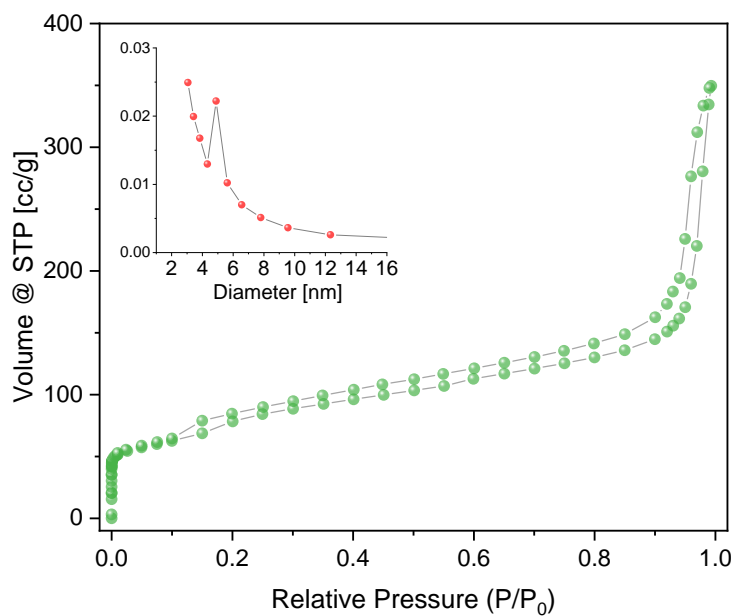

**Figure S2.** The physical structure properties of the obtained MFI zeolite.

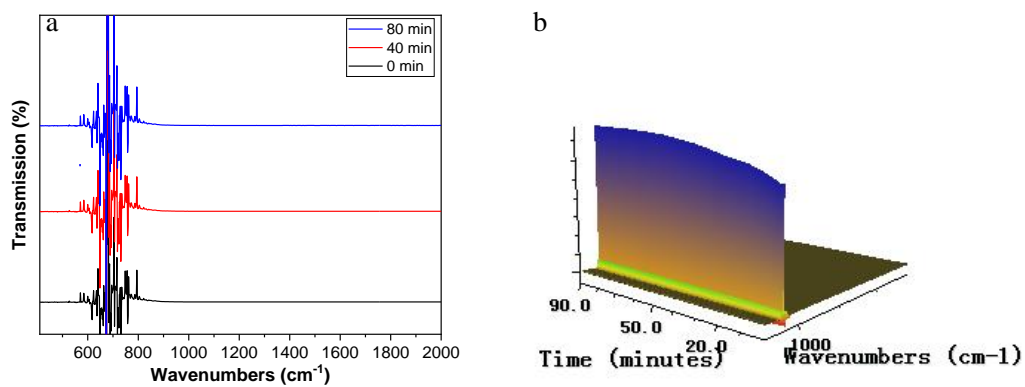

**Figure S3.** (a) 1D, (b) 3D DRIFT spectra of monocomponent SiO<sub>2</sub> in an in-situ cell as a function of time at the rate of 4°C/min from 20 °C (0 min) to 180 °C (40 min) and then keep at 180°C until 80 min.

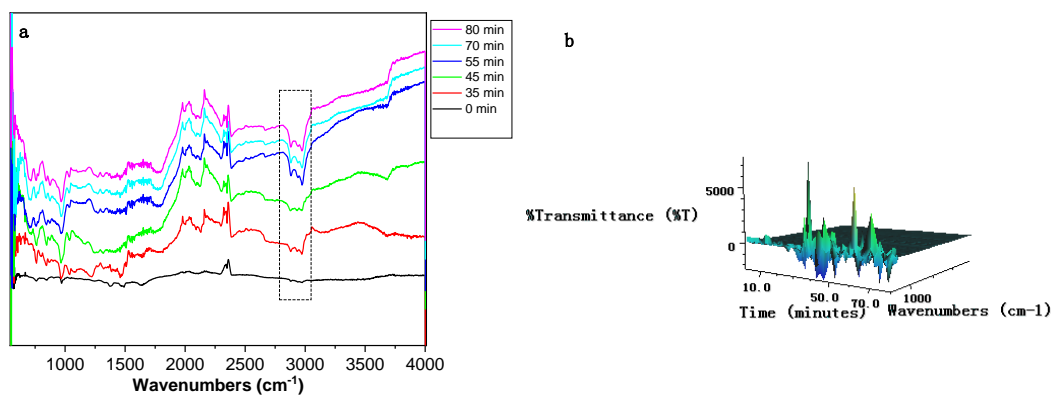

**Figure S4.** (a) 1D, (b) 3D DRIFT spectra of monocomponent C<sub>12</sub>H<sub>28</sub>NF in an in-situ cell as a function of time at the rate of 4°C/min from 20 °C to 180 °C and then keep at 180 °C until 80 min.

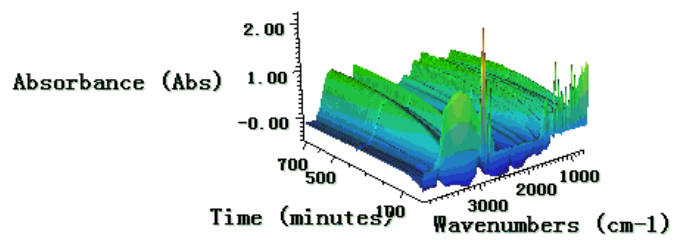

**Figure S5.** In-situ 3D DRIFT spectra of MFI zeolite sample from  $\text{SiO}_2$  and  $\text{C}_{12}\text{H}_{28}\text{NF}$  in an in-situ cell as a function of time from 20 °C at the rate of 4°C/min to 180 °C and keep at 180 °C until 720 min.

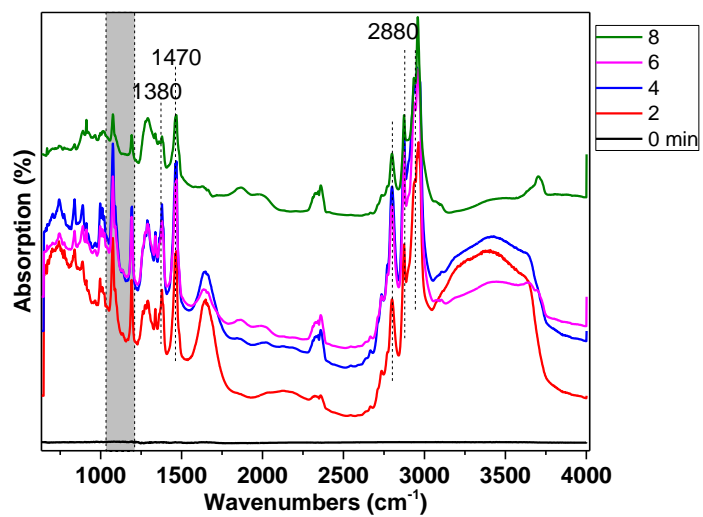

**Figure S6.** DRIFT spectra ( $950 - 4000 \text{ cm}^{-1}$ ) of MFI zeolite sample from  $\text{SiO}_2$  and  $\text{C}_{12}\text{H}_{28}\text{NF}$  in an in-situ cell during the heating-up period of the initial 10 minutes from  $20^\circ\text{C}$  (0 min) at the rate of  $4^\circ\text{C}/\text{min}$ .

**Table S1.** The attribution of DRIFT spectra (300 — 1250 cm<sup>-1</sup>) of MFI zeolite.

| Types                | External linking vibration |                      |                      | Internal tetrahedral vibration |                     |                      |                                |                               |                                |
|----------------------|----------------------------|----------------------|----------------------|--------------------------------|---------------------|----------------------|--------------------------------|-------------------------------|--------------------------------|
|                      | 300-<br>420                | 420-<br>500          | 500-650              | symmetric stretch              |                     |                      | asymmetric stretch             |                               |                                |
| $\mu/\text{cm}^{-1}$ |                            |                      |                      | 650-<br>750                    | 750-<br>820         | 820-<br>950          | 950-<br>1050                   | 1050-<br>1150                 | 1150-<br>1250                  |
| Assignment           | aperture                   | $\delta(\text{T-O})$ | Double Penta<br>ring | $\nu_s(\text{TO}_4)$           | $\nu_s(\text{T-O})$ | $\nu_s(\text{TO}_4)$ | $\nu_{\text{as}}(\text{TO}_4)$ | $\nu_{\text{as}}(\text{T-O})$ | $\nu_{\text{as}}(\text{TO}_4)$ |

Table S1 summarizes the vibration attribution of DRIFT spectra (300 — 1250 cm<sup>-1</sup>) of MFI zeolite. In general, these vibrations can be divided into two categories: internal tetrahedral vibration and external linking vibration, at 650 — 1250 cm<sup>-1</sup> and 300 — 650 cm<sup>-1</sup>, respectively. The specific vibratory variations of the samples during the crystallization for 12 h at 900 — 1250 cm<sup>-1</sup> are showed in Figure S7.



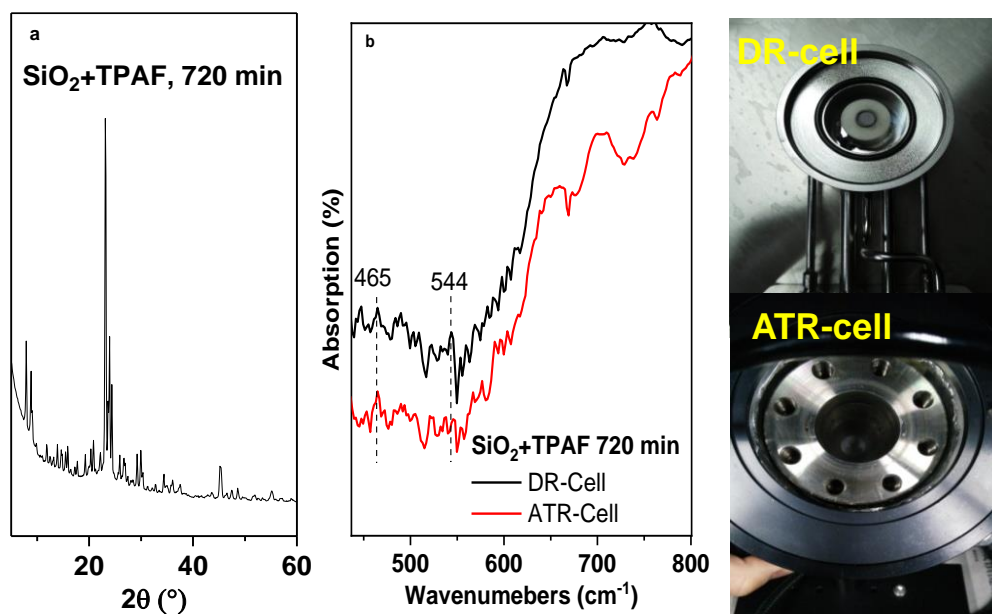

**Figure S7.** (a) XRD patterns, (b) ATR-FTIR spectra and DRIFT spectra ( $450 - 800 \text{ cm}^{-1}$ ) of zeolite samples from  $\text{SiO}_2$  and  $\text{C}_{12}\text{H}_{28}\text{NF}$  in different cells at  $180^\circ\text{C}$  after 12 h.

We conducted the crystallization process in both DRIFT cell and ATR autoclaves, both of the obtained products crystallized for 12 h at  $180^\circ\text{C}$  shows typical characteristic peaks of double penta-rings of MFI zeolite, 465 and 544  $\text{cm}^{-1}$ .

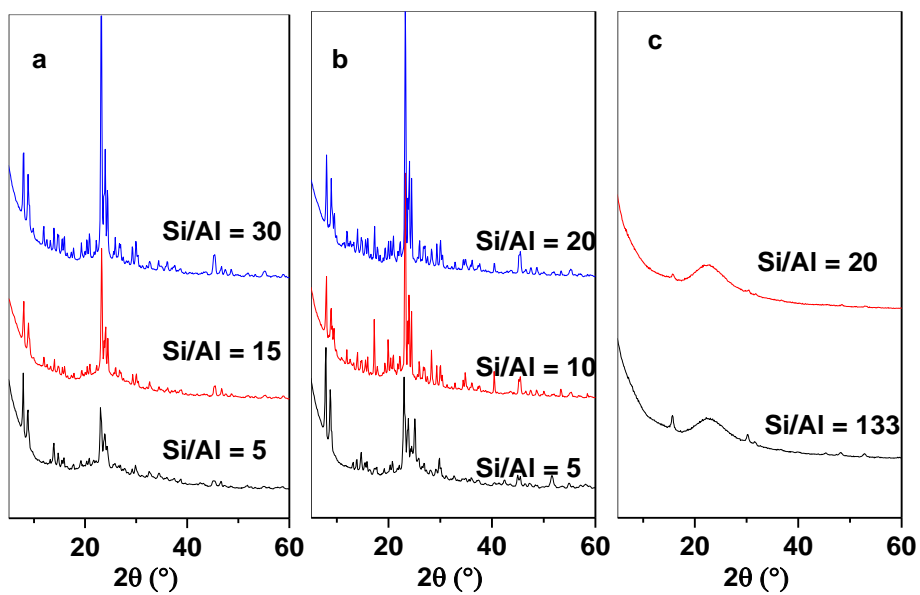

**Figure S8.** XRD patterns of ZSM-5 zeolite derived from (a)  $(C_3H_7O)_3Al$  (b)  $(NH_4)_3AlF_6$ , and (c)  $AlCl_3 \cdot 6H_2O$  at  $180^\circ C$  for 48 h.

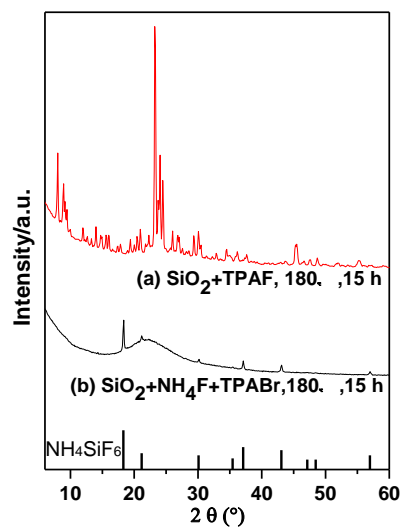

**Figure S9.** XRD patterns of samples derived from (a) the mixture of  $\text{SiO}_2$  and  $\text{C}_{12}\text{H}_{28}\text{NF}$ , and (b) the mixture  $\text{SiO}_2$ ,  $\text{C}_{12}\text{H}_{28}\text{NBr}$ , and  $\text{NH}_4\text{F}$  at  $180^\circ\text{C}$  for 15 h.

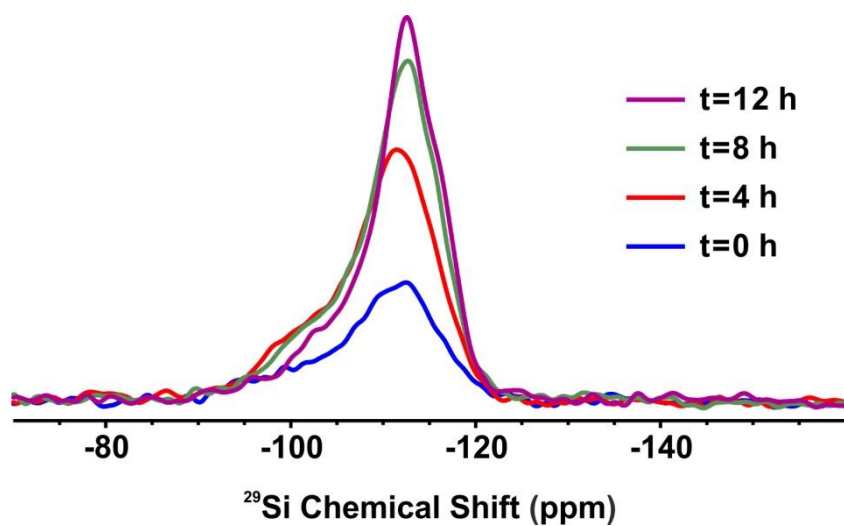

**Figure S10.**  $^{29}\text{Si}$  MAS NMR spectra of ZSM-5 zeolites crystallized at 180 °C for 0, 4, 8, 12 h, respectively.

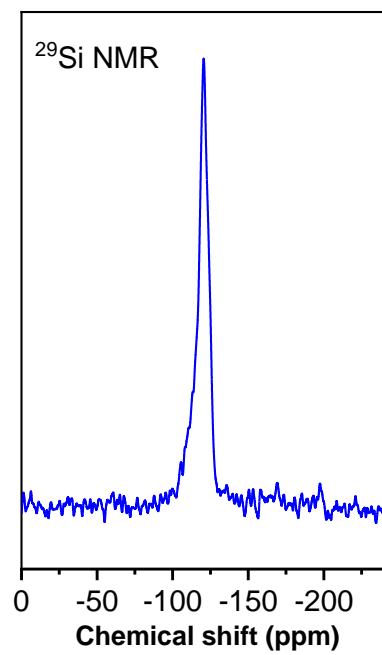

**Figure S11.**  $^{29}\text{Si}$  MAS NMR spectra of ZSM-5 zeolites crystallized for 24 h at 180 °C using  $\text{SiO}_2$ ,  $(\text{CH}_3\text{CH}_2\text{CH}_2)_4\text{NF}$  and  $\text{NaAlO}_2$  as raw materials.

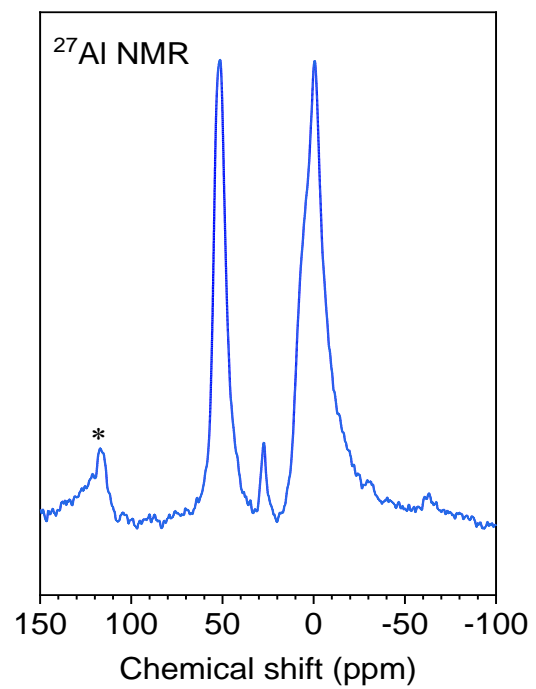

**Figure S12.**  $^{27}\text{Al}$  MAS NMR spectra of ZSM-5 zeolites crystallized at 180 °C for 24 h.

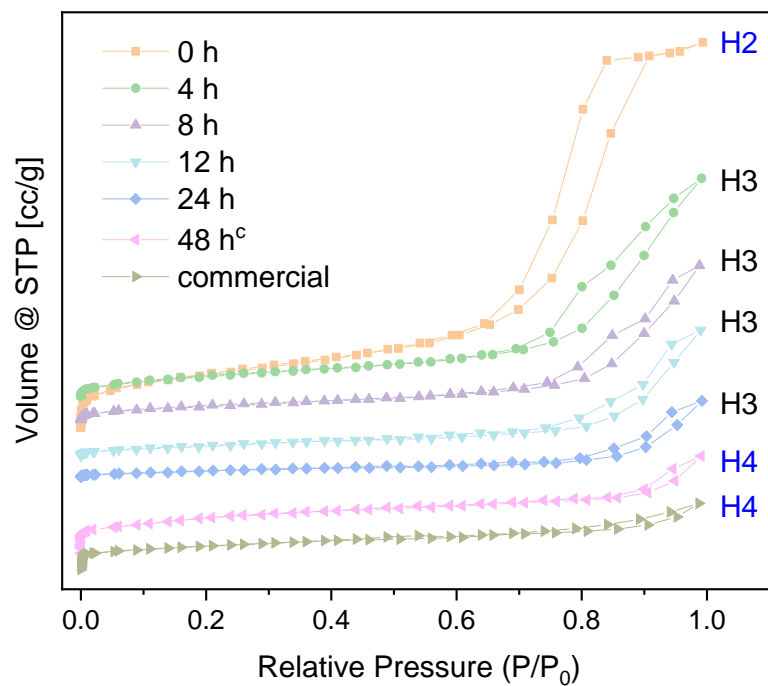

**Figure S13.** N<sub>2</sub> sorption of zeolite samples recovered at different crystallization time at 180 °C using SiO<sub>2</sub>, (CH<sub>3</sub>CH<sub>2</sub>CH<sub>2</sub>)<sub>4</sub>NF and NaAlO<sub>2</sub> as raw materials. More details see Table S2.

**Table S2.** Texture properties of zeolite samples recovered at different crystallization time at 180 °C using SiO<sub>2</sub>, (CH<sub>3</sub>CH<sub>2</sub>CH<sub>2</sub>)<sub>4</sub>NF and NaAlO<sub>2</sub> as raw materials.

| t (h)            | BET surface<br>(m <sup>2</sup> /g) | Micropore<br>surface area<br>(m <sup>2</sup> /g) <sup>a</sup> | Pore volume<br>(cm <sup>3</sup> /g) <sup>b</sup> | Pore Diameter<br>(nm) <sup>b</sup> |
|------------------|------------------------------------|---------------------------------------------------------------|--------------------------------------------------|------------------------------------|
| 0                | 308                                | 26                                                            | 1                                                | 9.7                                |
| 4                | 123                                | -                                                             | 0.55                                             | 9.6                                |
| 8                | 84                                 | 8                                                             | 0.38                                             | 12.1                               |
| 12               | 67                                 | 3                                                             | 0.31                                             | 12.1                               |
| 24               | 37                                 | -                                                             | 0.19                                             | 12.3                               |
| 48 <sup>c</sup>  | 315                                | 214                                                           | 0.16                                             | 3.7                                |
| commercial ZSM-5 | 256                                | 178                                                           | 0.12                                             | 3.7                                |

<sup>a</sup> t-plot method.

<sup>b</sup> BJH desorption.

<sup>c</sup> The sample was calcined at 550 °C in air.



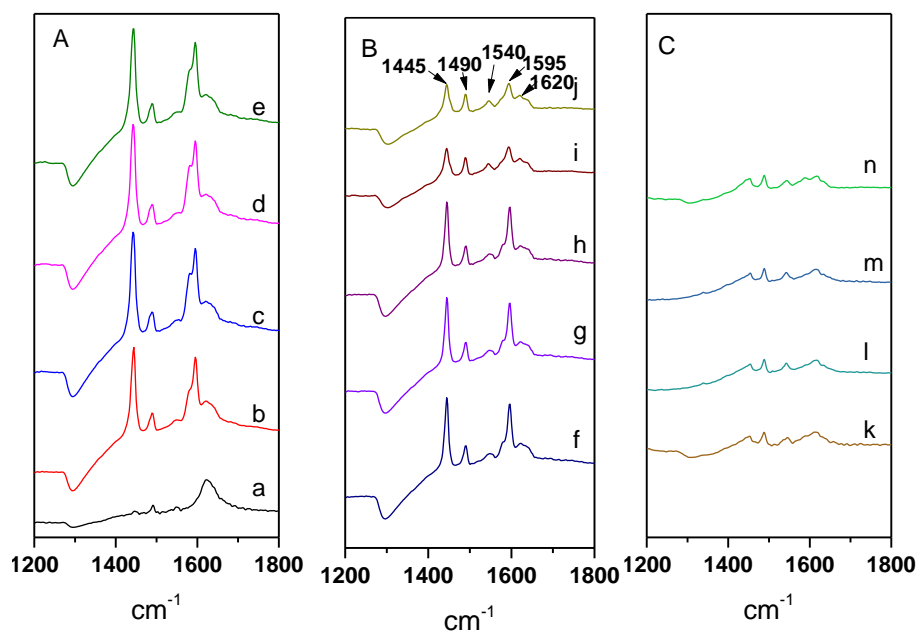

**Figure S14.** Pyridine adsorption-desorption FTIR spectra of ZSM-5 (Si/Al = 53) synthesized from aluminium isopropoxide. (A) pyridine adsorption at 50 °C: (a) background, (b) 6, (c) 30, (d) 36, (e) 39 min. (B) purge and desorption: purge for (f) 4, (g) 11, (h) 13 min, and desorption at 200°C for (i) 3, (j) 15 min. (C) desorption at 300°C for (k) 0, (l) 20, (m) 23, (n) 25 min.

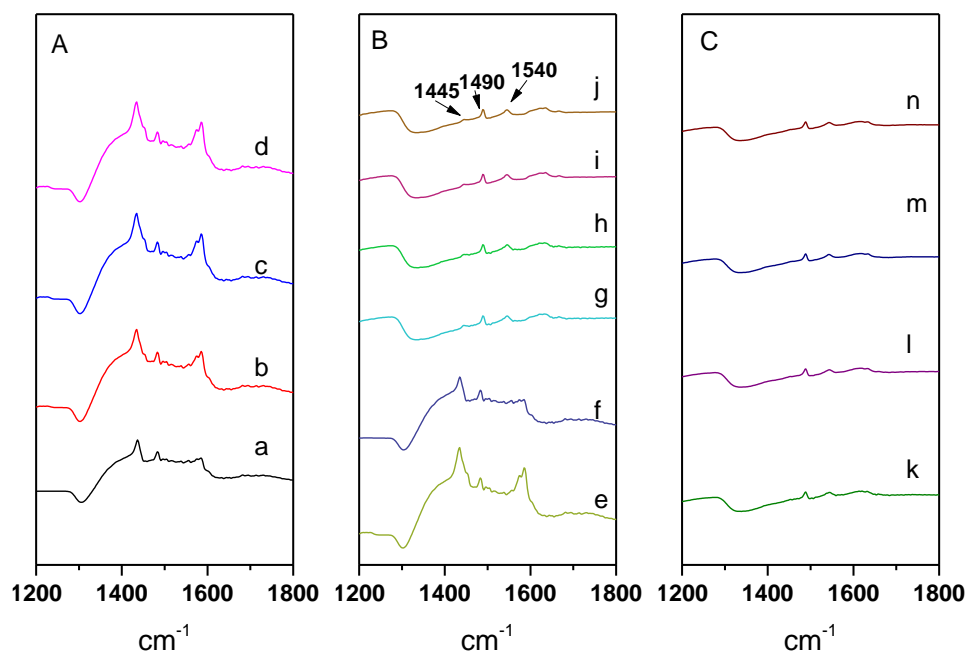

**Figure S15.** Pyridine adsorption-desorption FTIR spectra of ZSM-5 (Si/Al = 133) synthesized from aluminium isopropoxide. (A) pyridine adsorption: (a) 0, (b) 3, (c) 10, (d) 20 min. 39 min. (B) purge and desorption: purge for (e) 0, (f) 15, and desorption at 200°C for (g) 0, (h) 7, (i) 10, (j) 13 min. (C) desorption at 300°C for (k) 0, (l) 10, (m) 15, (n) 20 min.

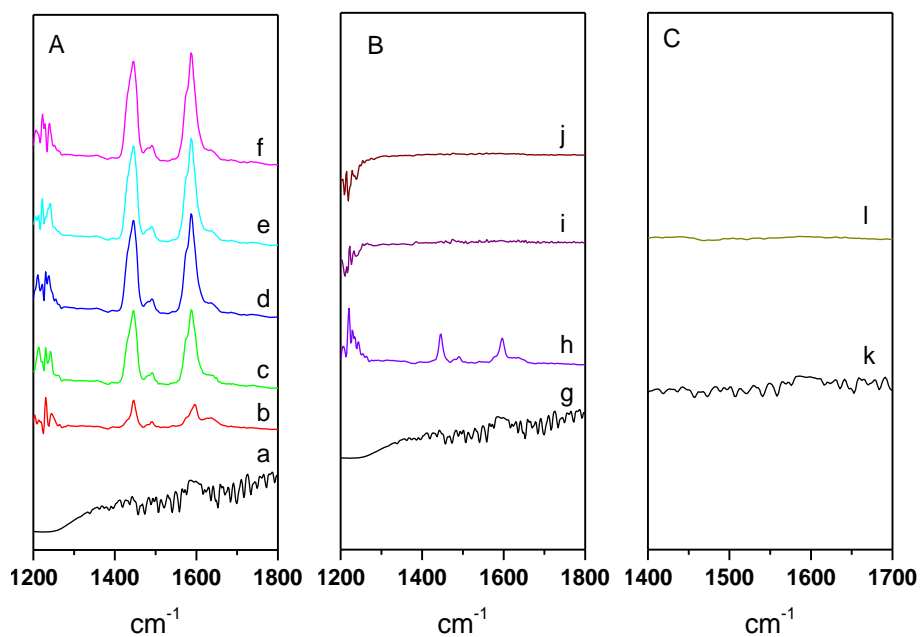

**Figure S16.** Pyridine adsorption-desorption FTIR spectra of ZSM-5 (Si/Al = 20) synthesized from  $\text{NaAlO}_2$ . (A) pyridine adsorption: (a) background, (b) 1, (c) 4, (d) 11, (e) 14, (f) 21 min. (B) purge and desorption: (g) background, (h) purge for 10 min, and desorption at 200°C for (i) 0, (j) 15 min. (C) desorption at 300°C for (k) background, (l) 1 min.
